# Supplementary material for: Referral Sources Across Racial and Ethnic Groups at Alzheimer’s Disease Research Centers
Source: PubMed Central journal article supplement — J Alzheimers Dis. 2024 Oct 8;101(4):1167–76. doi: 10.3233/JAD-240485 (PMC11492003; doi:10.3233/jad-240485), 2024-10-08
Supplement: jad-101-jad240485-s001.pdf [file jad-101-jad240485-s001.pdf]

# Supplementary Material

## Referral Sources Across Racial and Ethnic Groups at Alzheimer's Disease Research Centers

**Supplementary Table 1.** Comparison of percentages of participants from study sites with MRI by race and ethnicity group.

|                    | <b>Sites without MRIs<br/>(n=12,294)</b> | <b>Sites with MRIs<br/>(n=36,036)</b> | <b>p</b> |
|--------------------|------------------------------------------|---------------------------------------|----------|
| Hispanic           | 684 (5.6%)                               | 3,454 (9.6%)                          | 0.6492   |
| Non-Hispanic Asian | 161 (1.3%)                               | 1,231 (3.4%)                          | 0.0214   |
| Non-Hispanic Black | 2,343 (19.1%)                            | 4,423 (12.3%)                         | 0.0881   |
| Non-Hispanic White | 8,754 (71.2%)                            | 26,604 (73.8%)                        | 0.2998   |
| Other race         | 352 (2.9%)                               | 324 (0.9%)                            | 0.0398   |

**Supplementary Table 2.** Results from a mixed effects logistic regression model using generalized estimating equations on professional referral source by primary language in Hispanic participants (n=3,036). Adjusted for age, gender, education, visit year, and CDR with a random effect for study site.

| Independent variables                    | <i>Odds Ratio</i> | <i>95% CI</i> | <i>p</i> |
|------------------------------------------|-------------------|---------------|----------|
| Age (y)                                  | 1.00              | 0.99-1.01     | 0.6989   |
| Female                                   | 0.85              | 0.72-1.00     | 0.0542   |
| Years of Education                       | 0.99              | 0.98-1.00     | 0.0179   |
| Global CDR - overall                     |                   |               | <0.0001  |
| 0.0                                      | 0.26              | 0.17-0.39     | <0.0001  |
| 0.5                                      | 0.67              | 0.51-0.87     | 0.0032   |
| 1.0                                      | 1.05              | 0.78-1.41     | 0.7446   |
| >1                                       | 1.00              | 1.00-1.00     | --       |
| Visit Year - overall                     |                   |               | <0.0001  |
| 2005                                     | 1.02              | 0.38-2.75     | 0.9664   |
| 2006-2007                                | 1.07              | 0.44-2.62     | 0.8751   |
| 2008-2012                                | 0.73              | 0.37-1.43     | 0.3580   |
| 2013-2017                                | 1.23              | 0.75-2.00     | 0.4160   |
| 2018-2019                                | 0.98              | 0.51-1.88     | 0.9548   |
| 2020-2021                                | 1.40              | 0.79-2.47     | 0.2480   |
| 2022-2023                                | 1.00              | 1.00-1.00     | --       |
| Primary language: English versus Spanish | 0.87              | 0.67-1.12     | 0.2797   |

Reference, non-professional contact; CDR, Clinical Dementia Rating scale; professional, referrals made by healthcare professionals; non-professional, self, family and friends.

**Supplementary Table 3.** Results from a mixed effects logistic regression model with generalized estimating equations on professional referral source by primary language in Non-Hispanic Asian participants (n=956). Adjusted for age, gender, education, visit year, and CDR with a random effect for study site.

| Independent variables                       | <i>Odds Ratio</i> | <i>95% CI</i> | <i>p</i> |
|---------------------------------------------|-------------------|---------------|----------|
| Age (y)                                     | 1.00              | 0.97-1.02     | 0.7987   |
| Female                                      | 0.74              | 0.57-0.97     | 0.0271   |
| Years of Education                          | 1.02              | 1.00-1.03     | 0.0065   |
| Global CDR - overall                        |                   |               | <0.0001  |
| 0.0                                         | 0.30              | 0.15-0.60     | 0.0007   |
| 0.5                                         | 0.78              | 0.46-1.31     | 0.3489   |
| 1.0                                         | 1.69              | 0.97-2.91     | 0.0616   |
| >1                                          | 1.00              | 1.00-1.00     |          |
| Visit Year - overall                        |                   |               | 0.0110   |
| 2005                                        | 1.77              | 0.45-6.89     | 0.4122   |
| 2006-2007                                   | 0.91              | 0.30-2.73     | 0.8712   |
| 2008-2012                                   | 1.38              | 0.44-4.31     | 0.5813   |
| 2013-2017                                   | 1.75              | 0.45-6.84     | 0.4222   |
| 2018-2019                                   | 1.53              | 0.53-4.39     | 0.4319   |
| 2020-2021                                   | 0.63              | 0.35-1.15     | 0.1311   |
| 2022-2023                                   | 1.00              | 1.00-1.00     |          |
| Primary language English versus Non-English | 1.46              | 1.03-2.07     | 0.0341   |

Reference, non-professional contact; CDR, Clinical Dementia Rating scale; professional, referrals made by healthcare professionals; non-professional, self, family and friends.
